# Supplementary material
Source: PubMed Central journal article supplement (PMC6919258)
Supplement: Supp_Fig1.pdf [file Supp_Fig1.pdf]

Supplementary Data

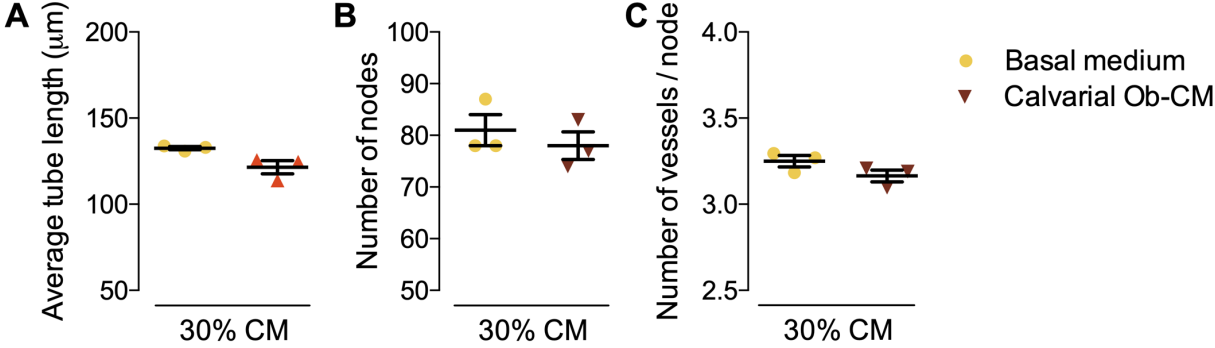

**Figure S1. Effects of calvarial osteoblast-conditioned media on tubular network formation.** Tube formation was evaluated using a mix of conditioned media (30% by volume) and ECFC basal medium (BM). **A-C)** Tubular network formation (N = 3/group). **A)** Average tube length. **B)** Number of nodes. **C)** Number of vessels per node.
